# Supplementary material for: Melanoxetin: A Hydroxylated Flavonoid Attenuates Oxidative Stress and Modulates Insulin Resistance and Glycation Pathways in an Animal Model of Type 2 Diabetes Mellitus
Source: MDPI journal article supplement (doi:10.3390/pharmaceutics16020261), 2024-02-09
Supplement: s1 [file s1]

# **Melanoxetin: A Hydroxylated Flavonoid Reduces Oxidative Stress in an Animal Model of Type 2 Diabetes Mellitus**

Sónia Rocha, Andreia Amaro, Marcos D. Ferreira-Junior, Carina Proença,  
Artur M.S. Silva, Vera M. Costa, Sara Oliveira, Diogo A. Fonseca, Sónia  
Silva, M. Luísa Corvo, Marisa Freitas, Paulo Matafome, Eduarda Fernandes

**Original Images of Western Blots**

Epididymal Adipose Tissue (EAT)

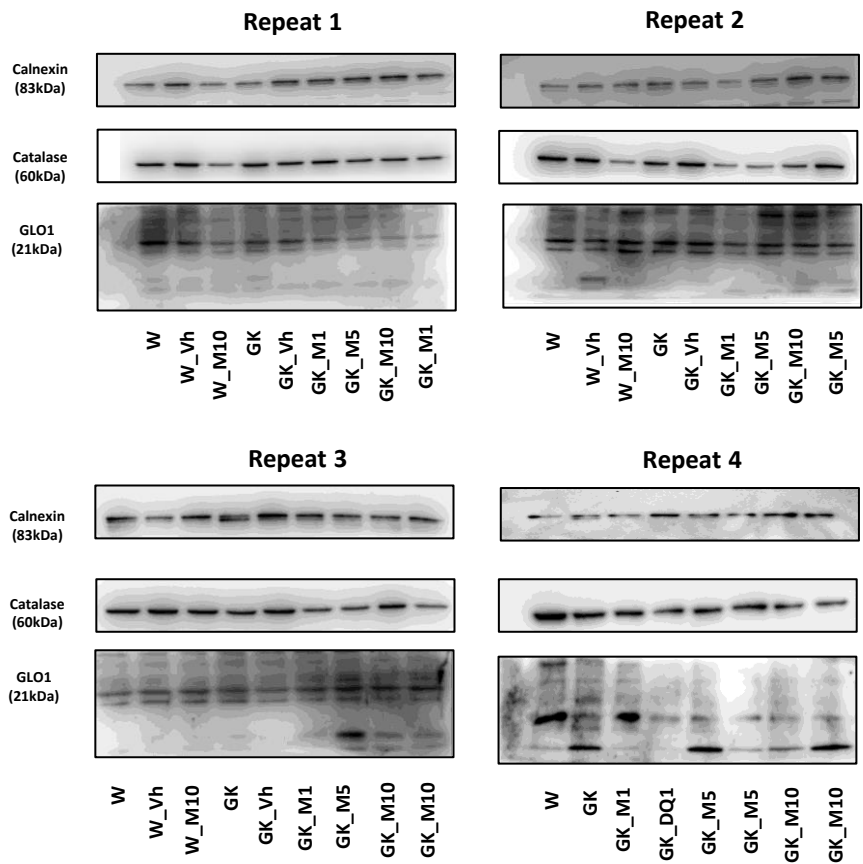

GLO1 [Supplementary figure S4A]  
Catalase [Figure 6A]

Epididymal Adipose Tissue (EAT)

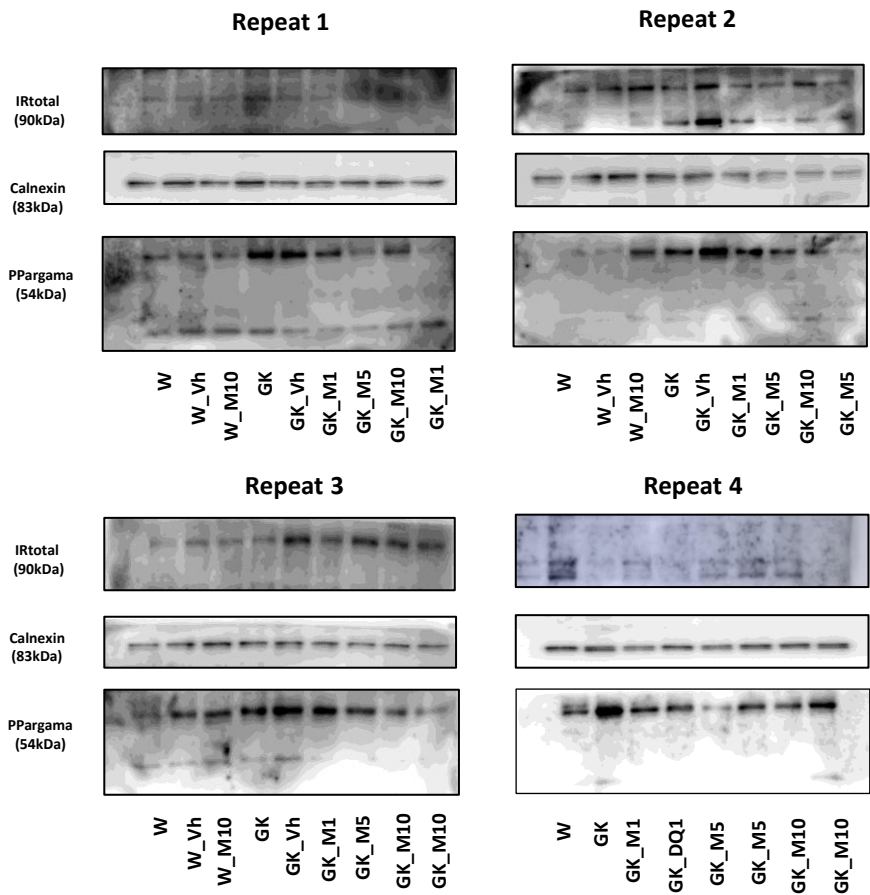

IRtotal [Supplementary figure S2A]  
PPARy [Figure 5A]

Epididymal Adipose Tissue (EAT)

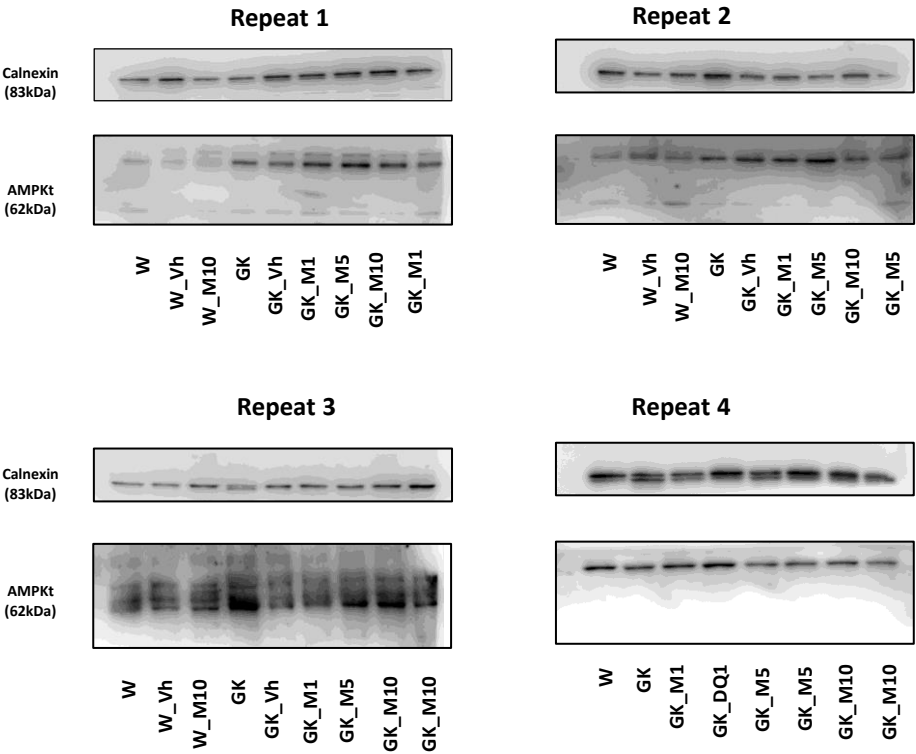

AMPK [Supplementary figure S2C]

Epididymal Adipose Tissue (EAT)

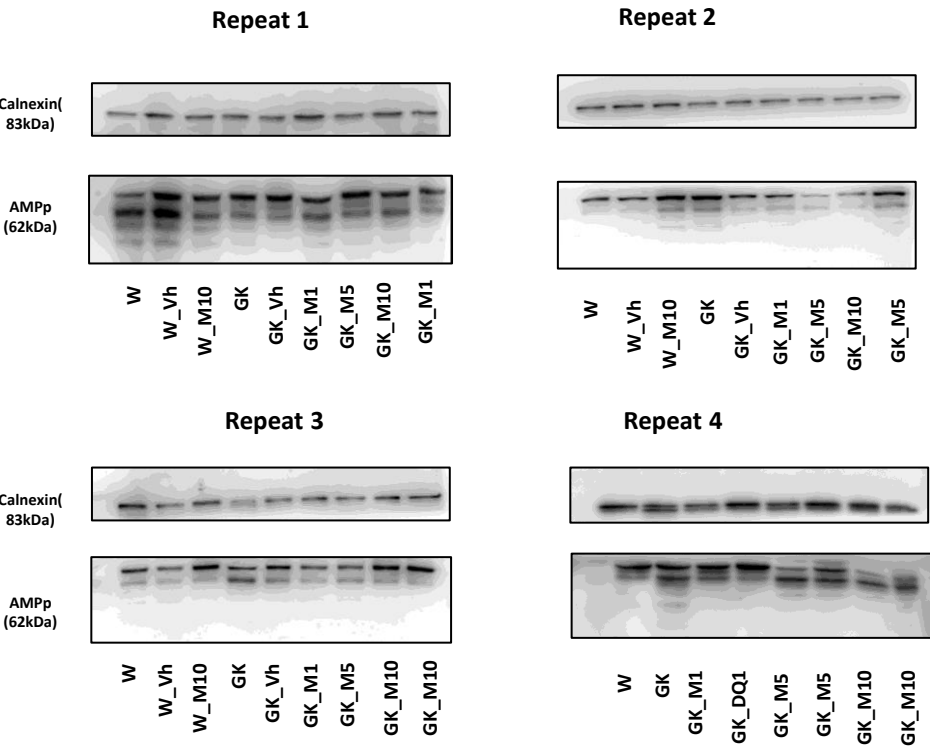

AMPKp [Supplementary figure S2]

Epididymal Adipose Tissue (EAT)

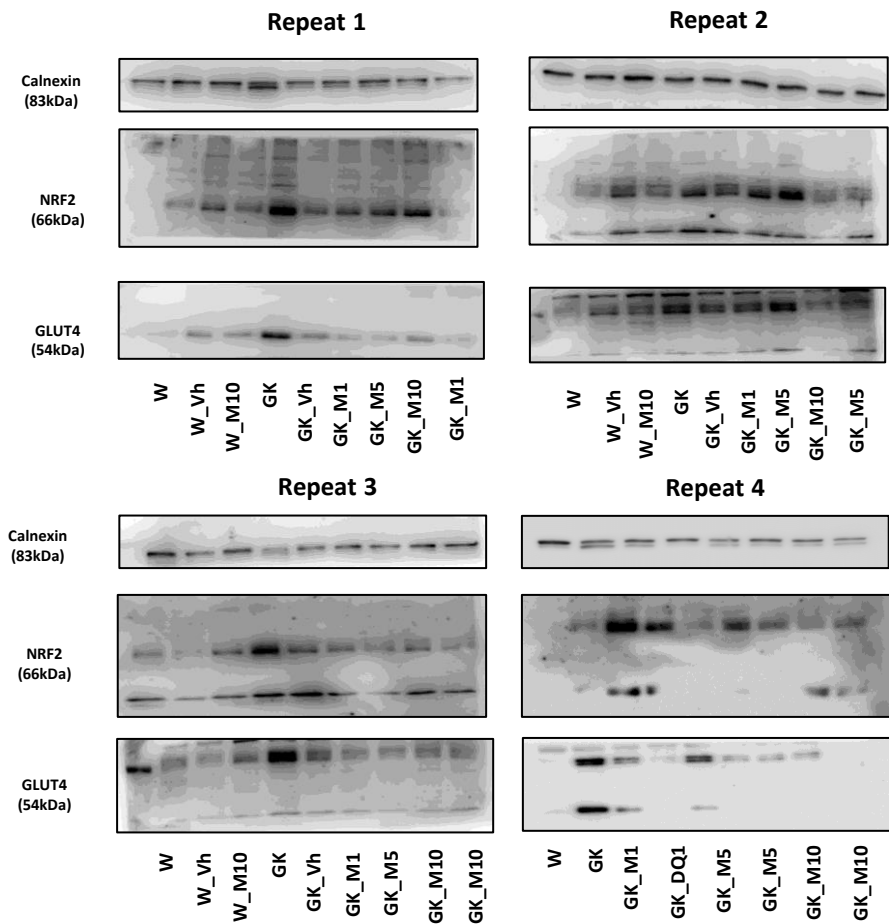

GLUT4 [Supplementary figure S2B]  
NRF2 [Supplementary figure S4B]

Epididymal Adipose Tissue (EAT)

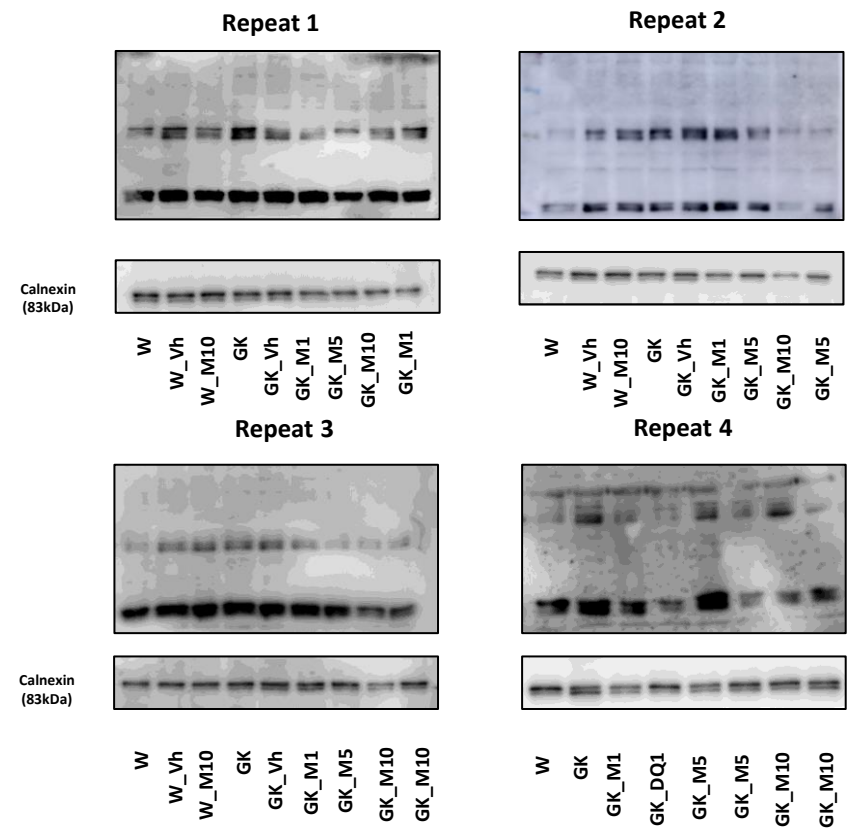

MGH1 [Figure 6D]

Epididymal Adipose Tissue (EAT)

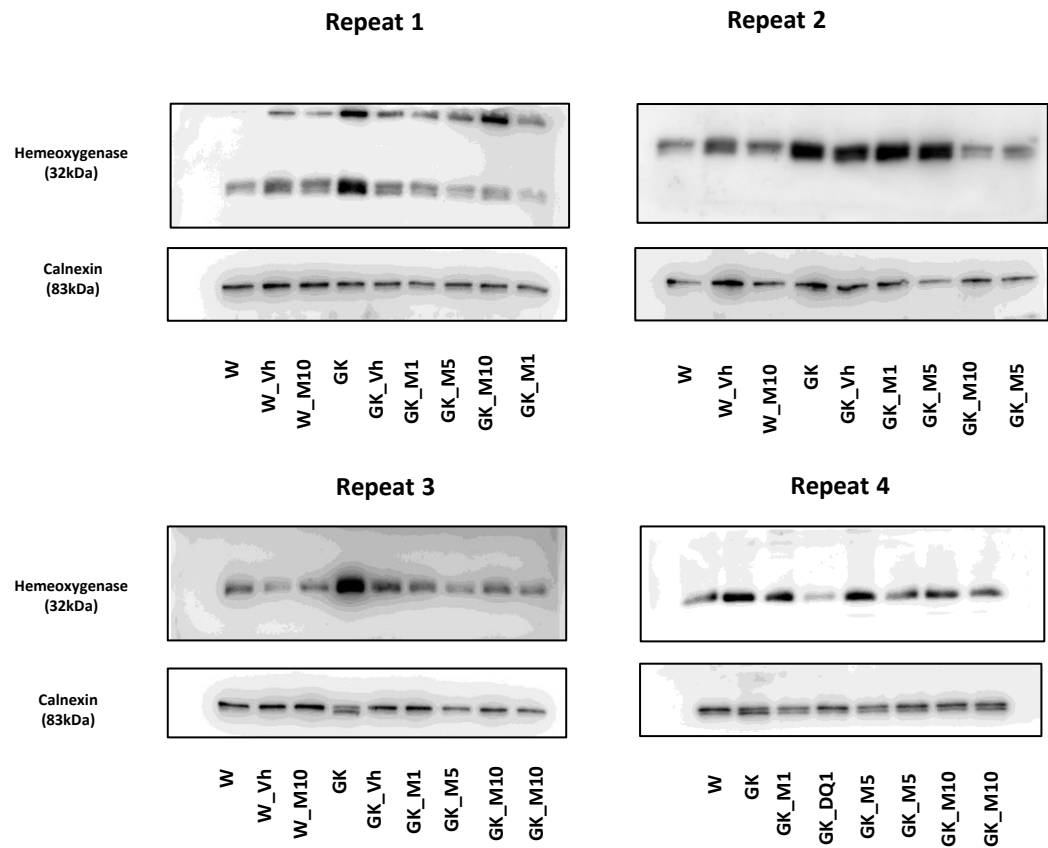

Hemeoxygenase [Figure 6C]

Epididymal Adipose Tissue (EAT)

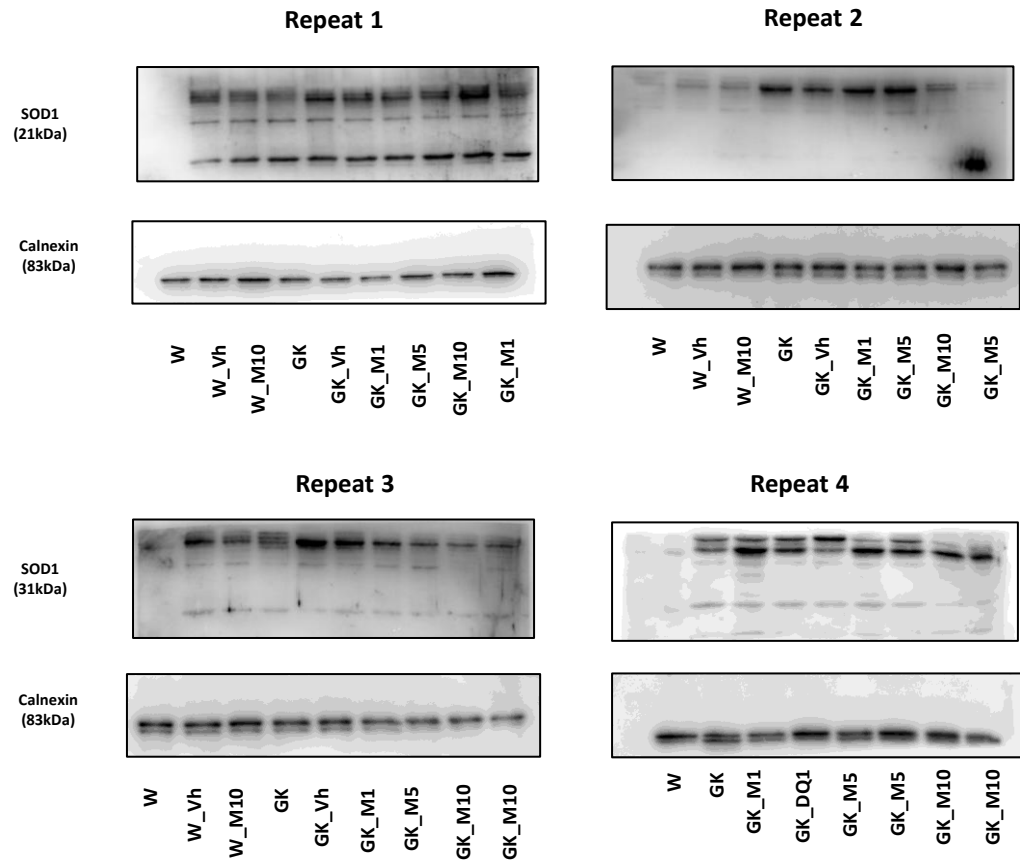

SOD1 [Figure 6B]

Epididymal Adipose Tissue (EAT)

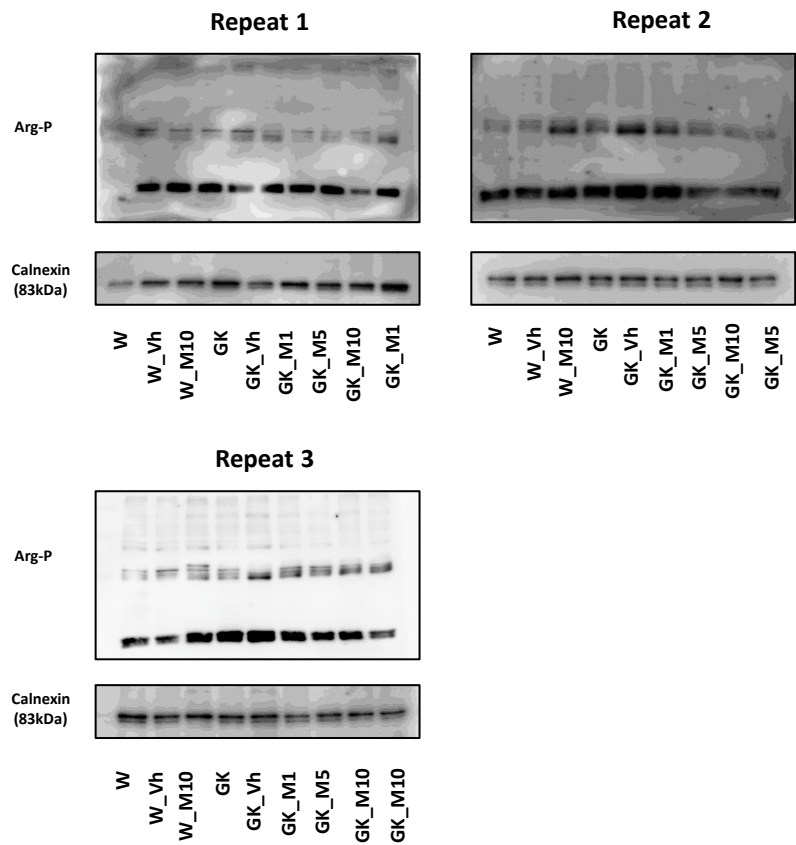

GLUT4 [Supplementary figure S4C]

Epididymal Adipose Tissue (EAT)

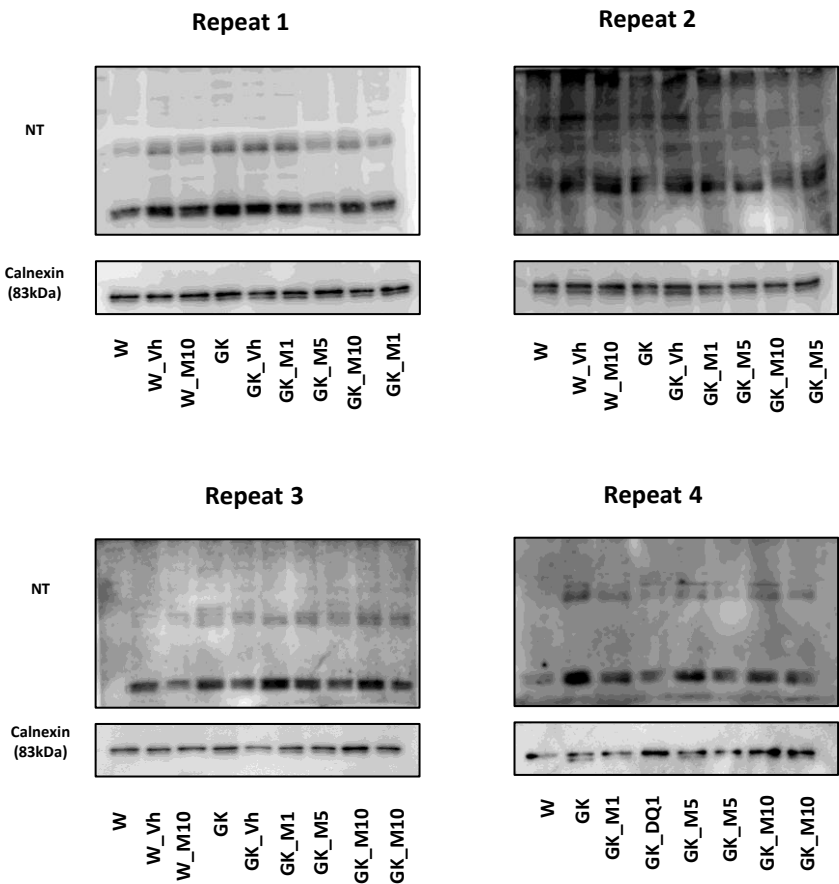

NT [Figure 6E]

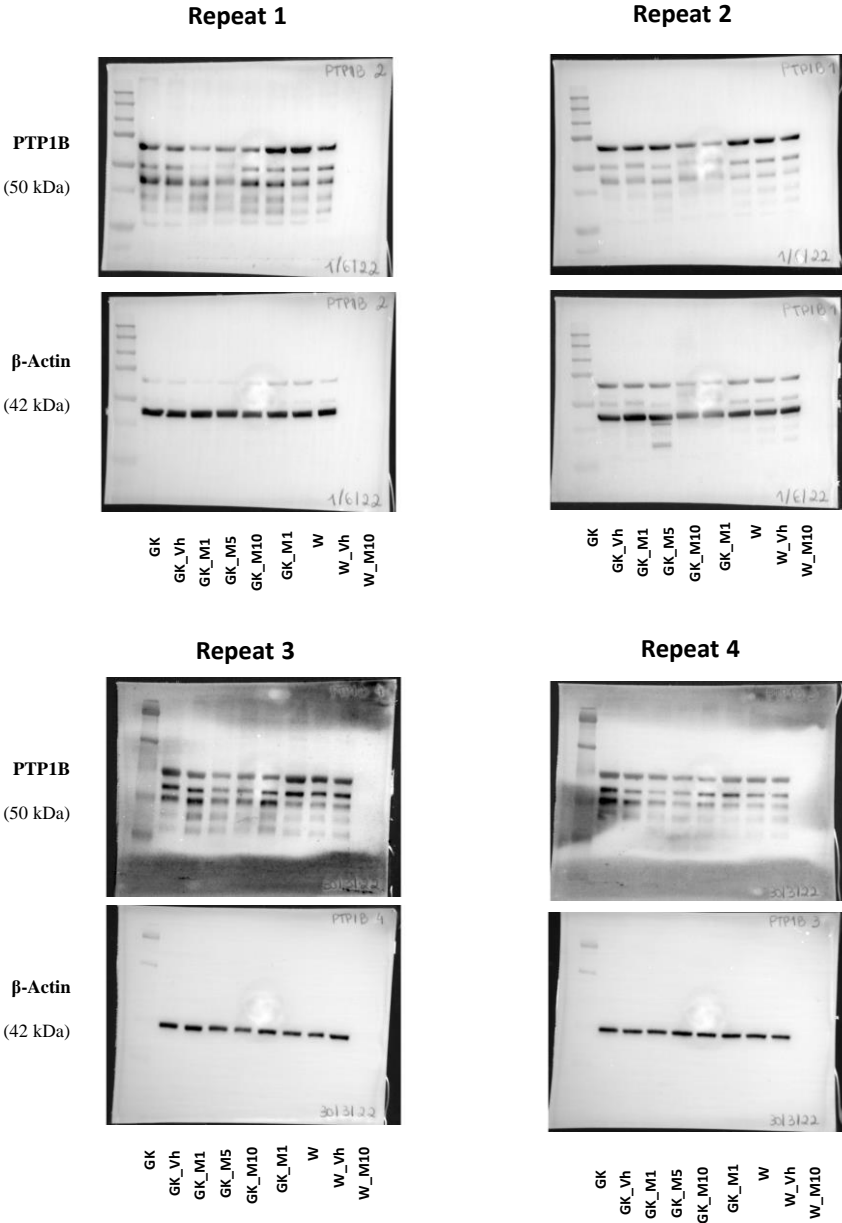

PTP1B [Figure 5B]

Liver

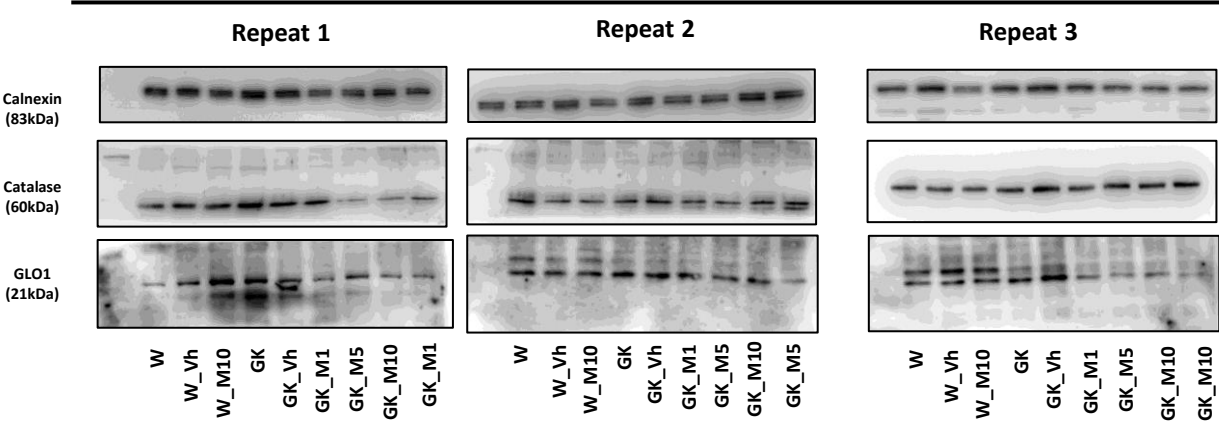

GLO1 [Figure 6F]

Catalase [Supplementary figure S5A]

Liver

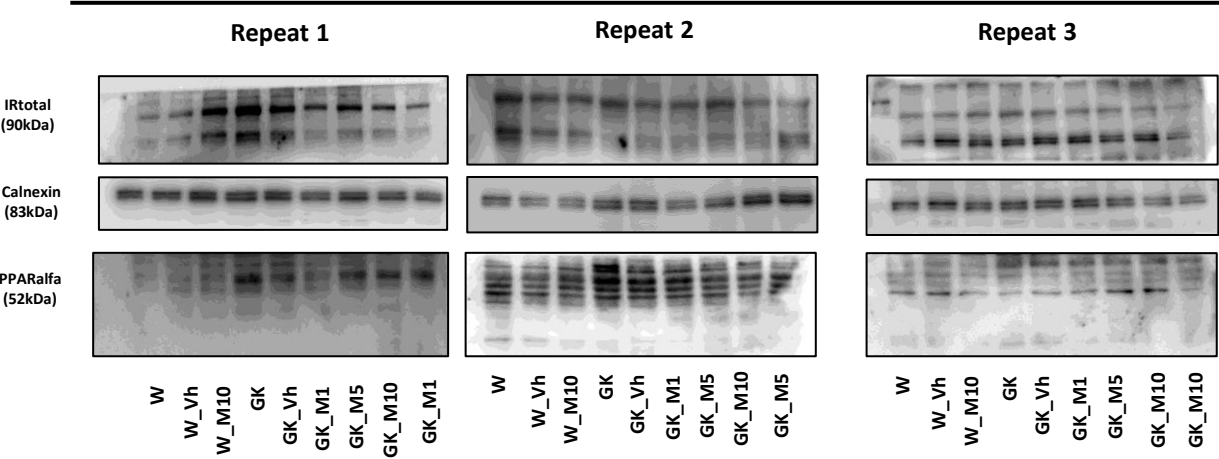

IRtotal [Supplementary figure S3A]

PPARalpha [Supplementary figure S3E]

Liver

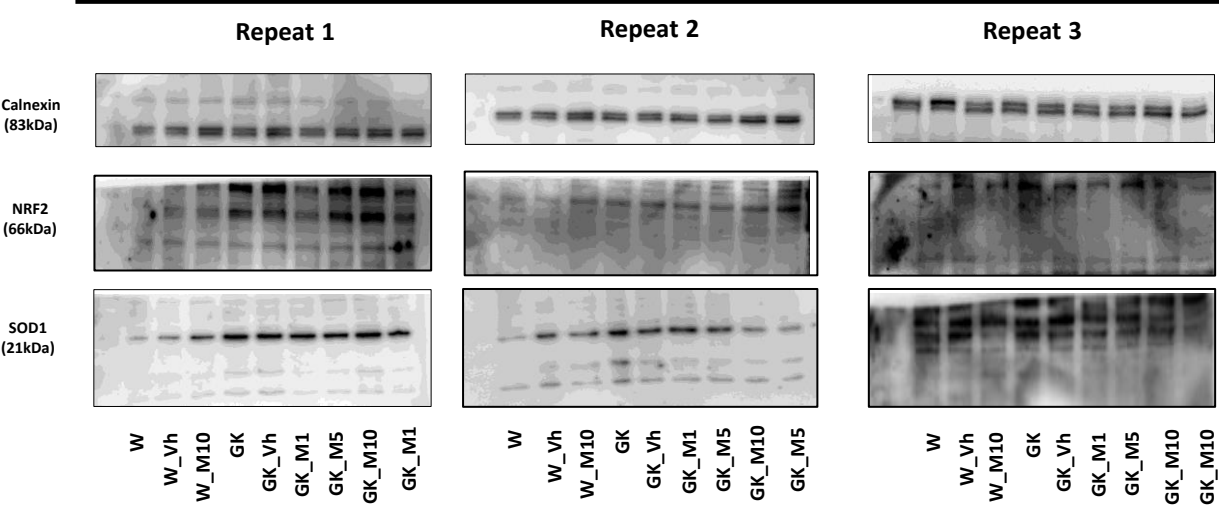

NRF2 and SOD1 [Supplementary figure S5B and S5C]



Liver

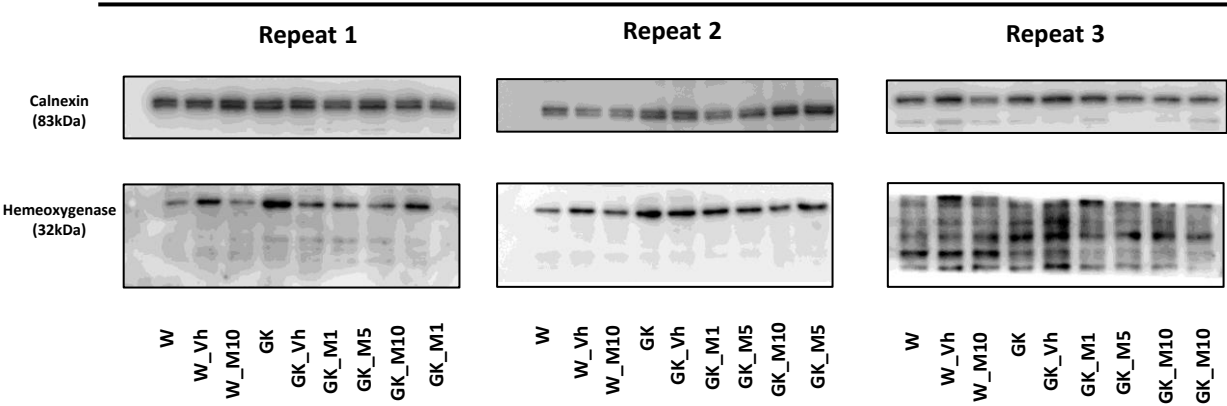

MG-H1 [Supplementary figure S5]

Liver

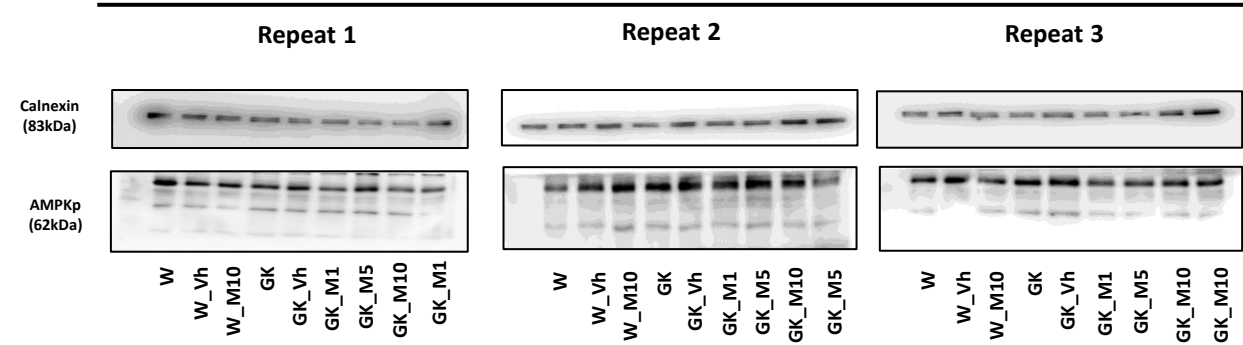

AMPKp [Supplementary figure S3C]

Liver

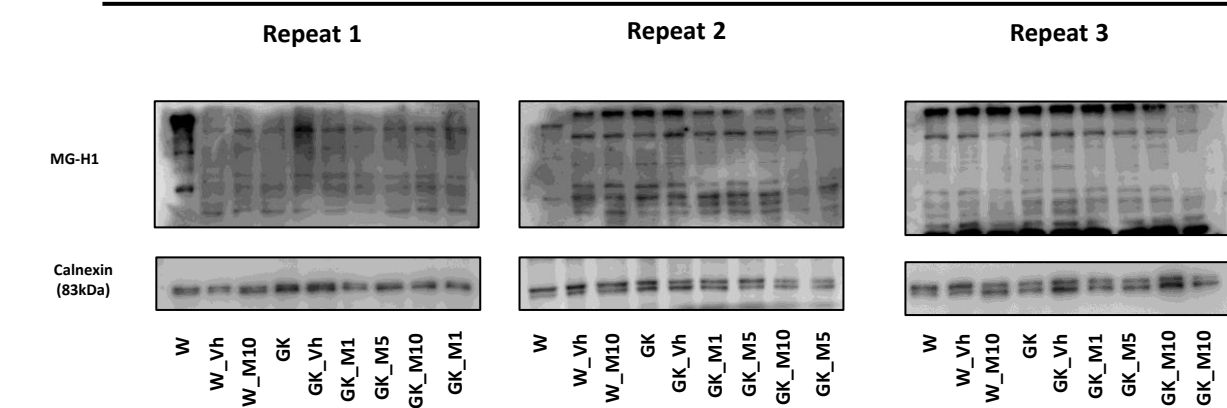

MG-H1 [Supplementary figure S5E]

Liver

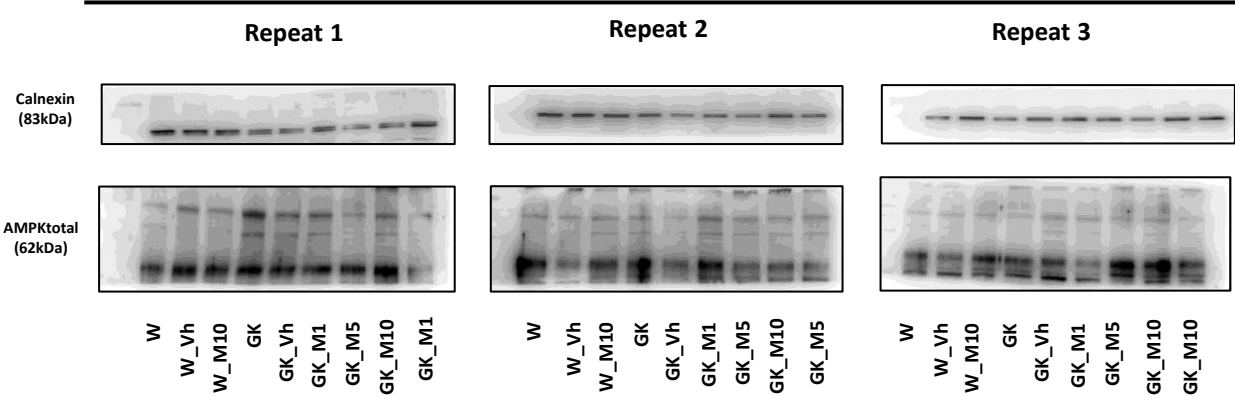

AMPKtotal [Supplementary figure S3B]

Liver

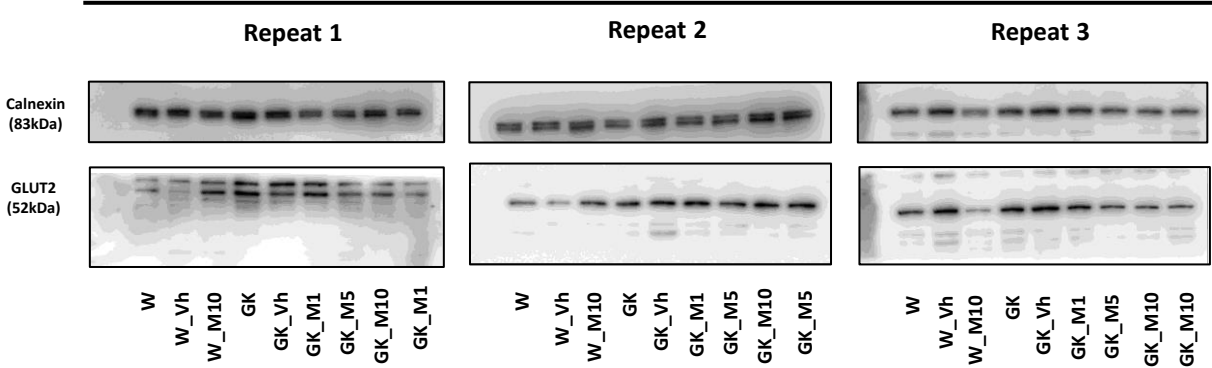

GLUT2 [Supplementary figure S3D]

Liver

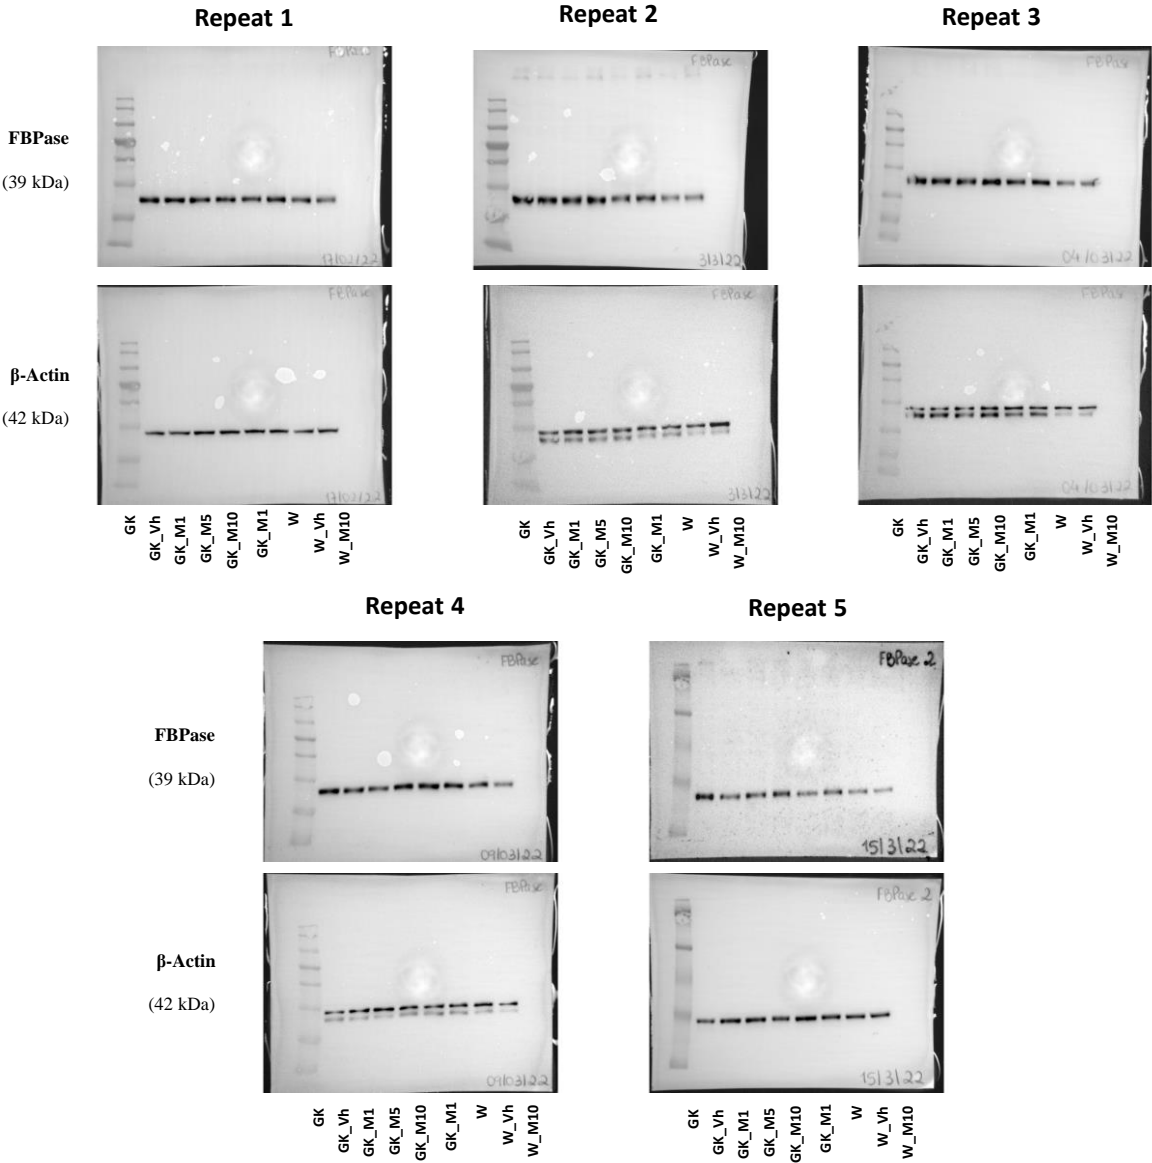

FBPase [Supplementary figure S3F] Liver

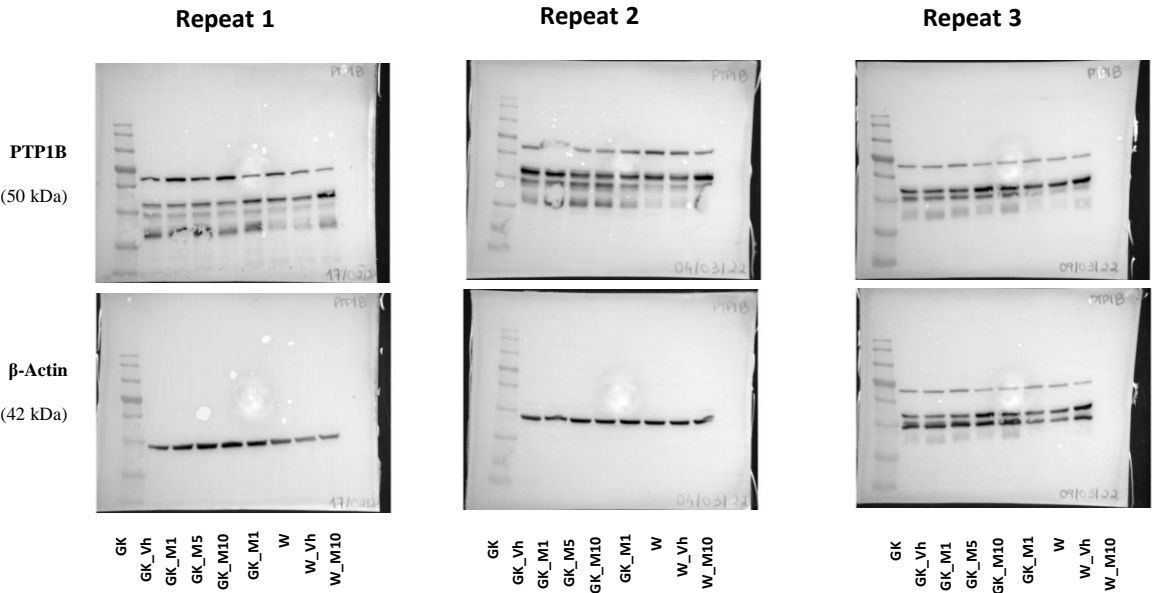

PTP1B [Figure 5C]

Heart

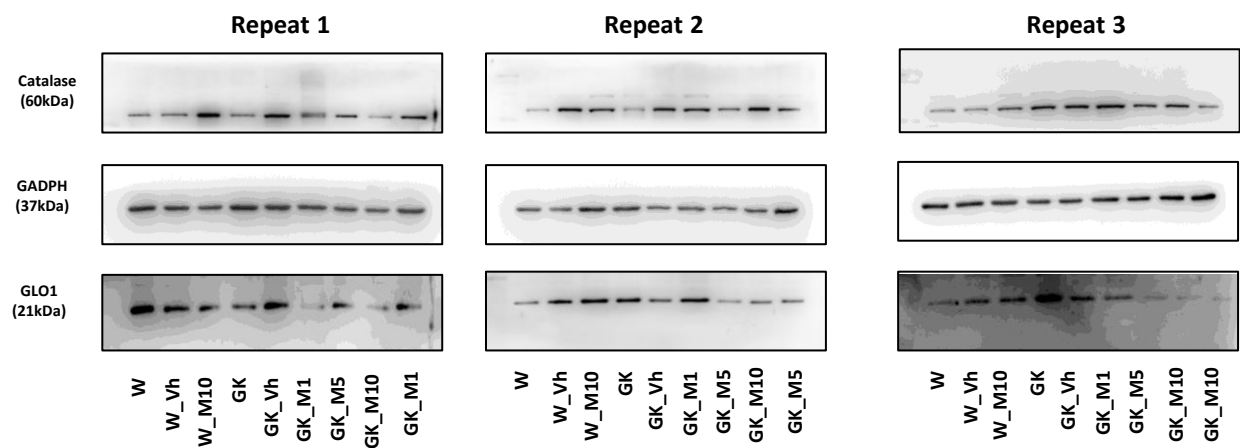

Catalase [Figure 7A]  
GLO1 [Figure 7B]

Heart

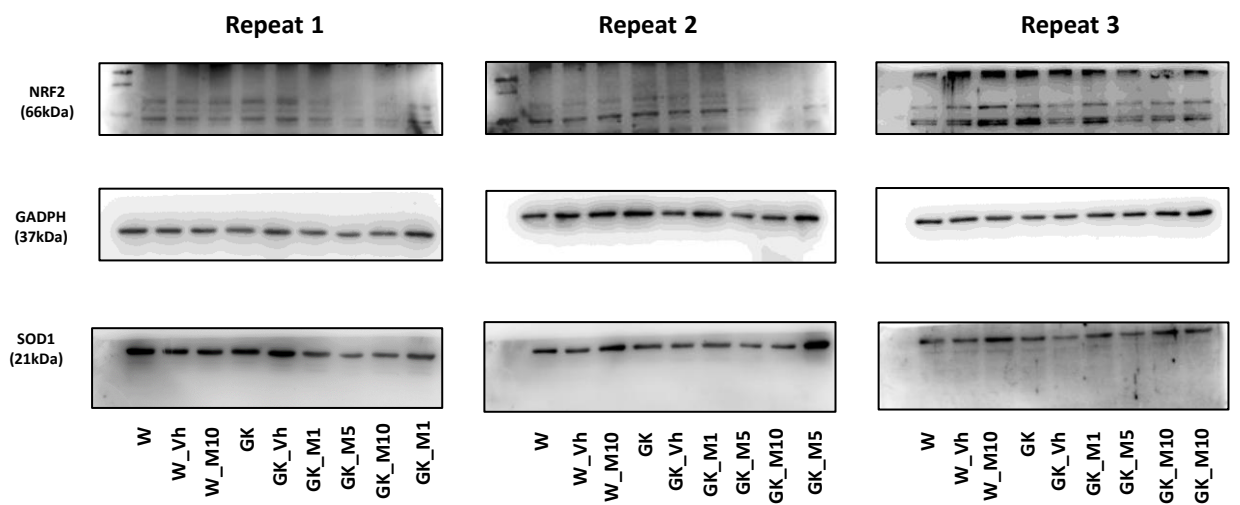

NRF2 and SOD1 [Supplementary figure S6A and S6B]

Heart

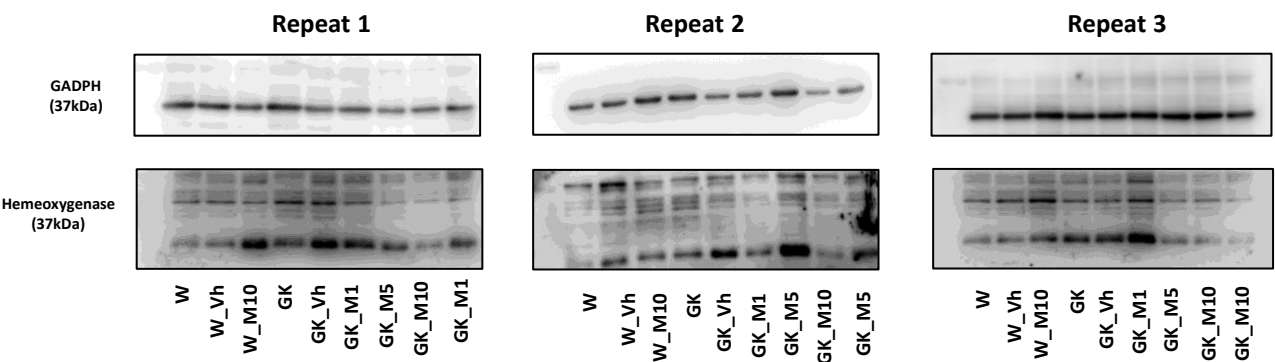

Hemeoxygenase [Supplementary figure S6C]

Heart

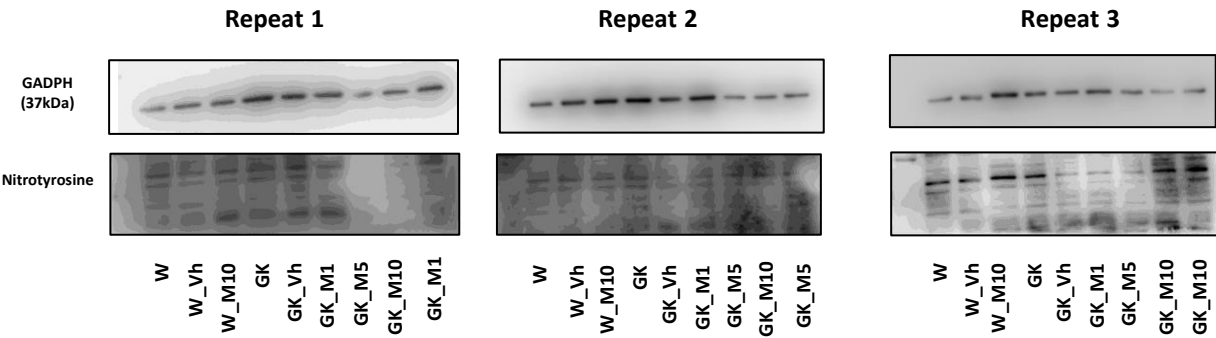

Nitrotyrosine[Supplementary figure S6D]

Heart

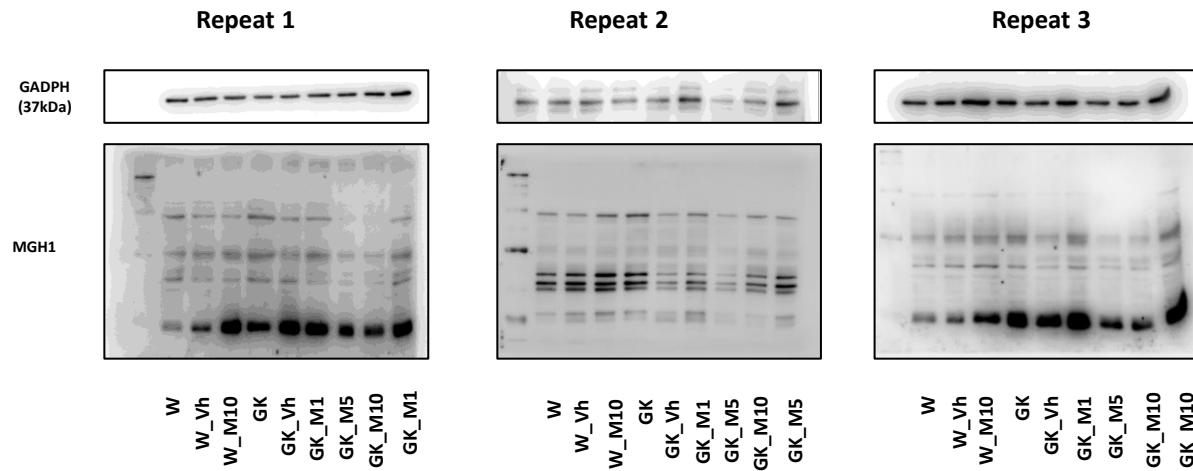

MG-H1 [Figure 7C]
