# Supplementary material for: Melanoxetin: A Hydroxylated Flavonoid Attenuates Oxidative Stress and Modulates Insulin Resistance and Glycation Pathways in an Animal Model of Type 2 Diabetes Mellitus
Source: MDPI journal article supplement (doi:10.3390/pharmaceutics16020261), 2024-02-09
Supplement: s1 [file s1]

# Supporting Information

## Melanoxetin: A Hydroxylated Flavonoid Attenuates Oxidative Stress and Modulates Insulin Resistance and Glycation Pathways in an Animal Model of Type 2 Diabetes Mellitus

Sónia Rocha, Andreia Amaro, Marcos D. Ferreira-Junior, Carina Proença, Artur M.S. Silva, Vera M. Costa, Sara Oliveira, Diogo A. Fonseca, Sónia Silva, M. Luísa Corvo, Marisa Freitas, Paulo Matafome, Eduarda Fernandes

**Table S1:** Table detailing antibody names, dilutions, and respective purchase sources for Western Blot analyses.

| Primary antibody     | Secondary antibody | Dilution | Company         |
|----------------------|--------------------|----------|-----------------|
| Anti- $\beta$ -Actin | Mouse              | 1:1000   | Merck           |
| Anti-AMPK total      | Rabbit             | 1:1000   | Cell Signalling |
| Anti-AMPKp           | Rabbit             | 1:1000   | Cell Signalling |
| Anti-Argpyrimidine   | Mouse              | 1:500    | Nordic          |
| Anti-Calnexin        | Goat               | 1:1000   | Sicgen          |
| Anti-Catalase        | Rabbit             | 1:1000   | Abcam           |
| Anti-FBPase          | Rabbit             | 1:1000   | Cell Signalling |
| Anti-GADPH           | Goat               | 1:1000   | Sicgen          |
| Anti-GLO1            | Rabbit             | 1:1000   | Abcam           |
| Anti-GLUT2           | Mouse              | 1:1000   | Abcam           |
| Anti-GLUT4           | Mouse              | 1:1000   | Abcam           |
| Anti-Hemeoxygenase   | Mouse              | 1:1000   | Abcam           |
| Anti-IR total        | Rabbit             | 1:1000   | Santa Cruz      |
| Anti-MG-H1           | Mouse              | 1:500    | HylcutBiotech   |
| Anti-Nitrotyrosine   | Mouse              | 1:500    | Abcam           |
| Anti-Nrf2            | Mouse              | 1:1000   | Santa Cruz      |
| Anti-PPAR $\alpha$   | Rabbit             | 1:1000   | Abcam           |
| Anti-PPAR $\gamma$   | Rabbit             | 1:1000   | Cell Signalling |
| Anti-PTP1B           | Rabbit             | 1:1000   | Abcam           |
| Anti-SOD1            | Rabbit             | 1:1000   | Abcam           |

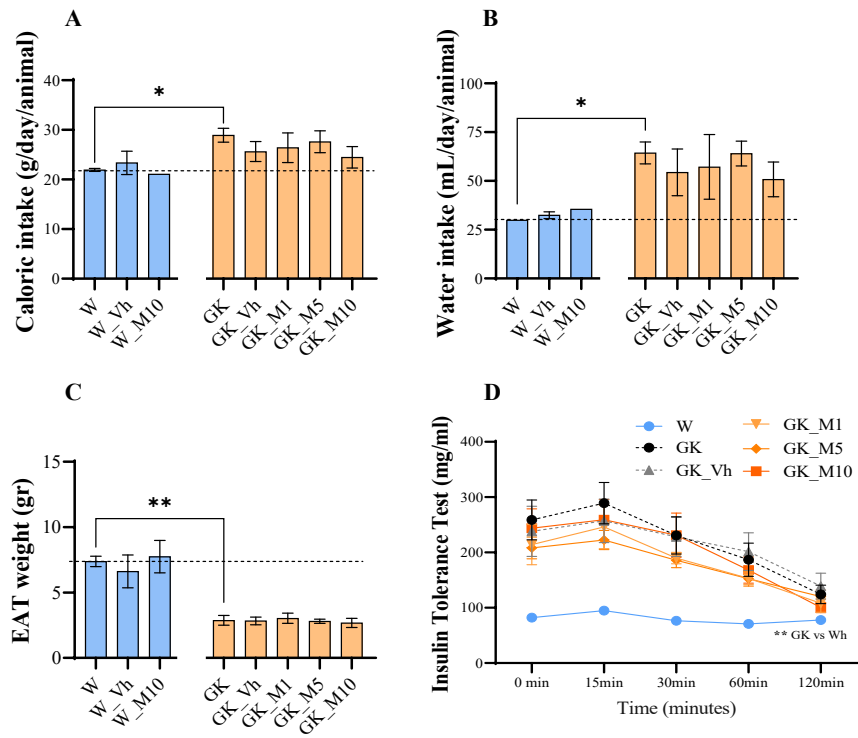

**Figure S1: Effect of melanoxetin on caloric intake (A), water intake (B) EAT weight (C) and insulin tolerance test (D) in normal and diabetic animals. Results are expressed as mean  $\pm$  SEM of 3 to 6 animals per group. \* $p$ <0.05, \*\* $p$ <0.01.**

## Epididymal Adipose Tissue

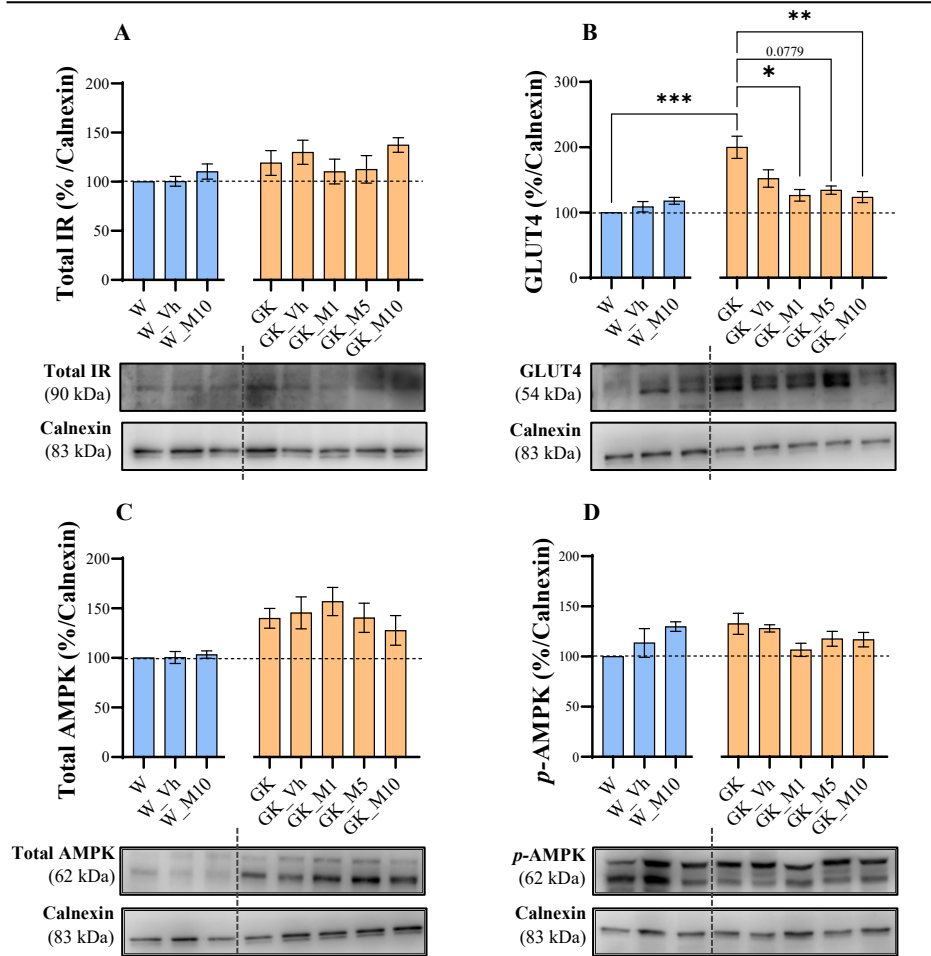

**Figure S2: Effect of melanoxetin on the expression of total IR (A), GLUT4 (B), total AMPK (C), and p-AMPK (D) in epididymal adipose tissue.** Results are expressed as mean  $\pm$  SEM of 3 to 6 animals per group. \* $p < 0.05$ , \*\* $p < 0.01$ , \*\*\* $p < 0.001$ .

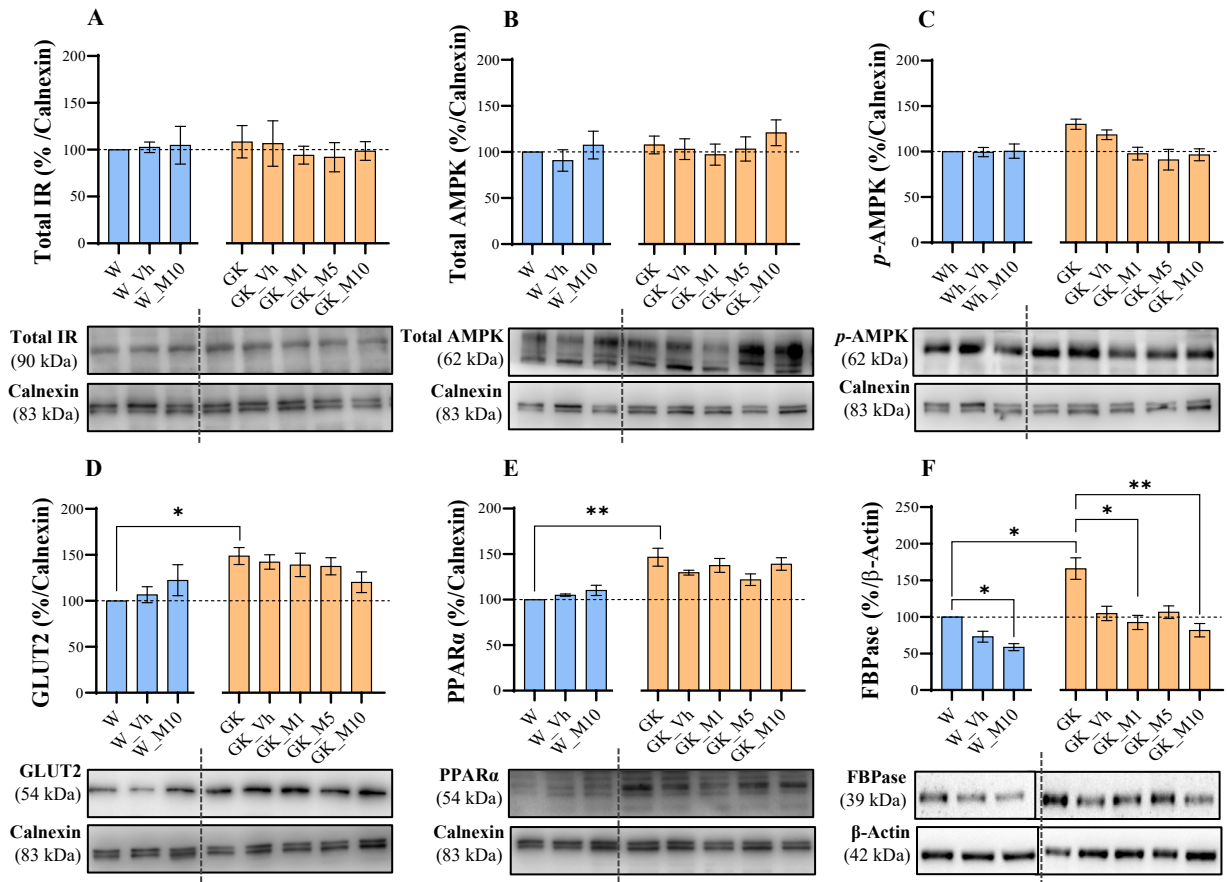

**Figure S3: Effect of melanoxinet on the expression of Total IR (A), Total AMPK (B), p-AMPK (C), GLUT2 (D), PPARα (E) and FBPAse (F) in liver tissue.** Results are expressed as mean  $\pm$  SEM of 3 to 6 animals per group. \* $p$ <0.05, \*\* $p$ <0.01.

# *Epididymal Adipose Tissue*

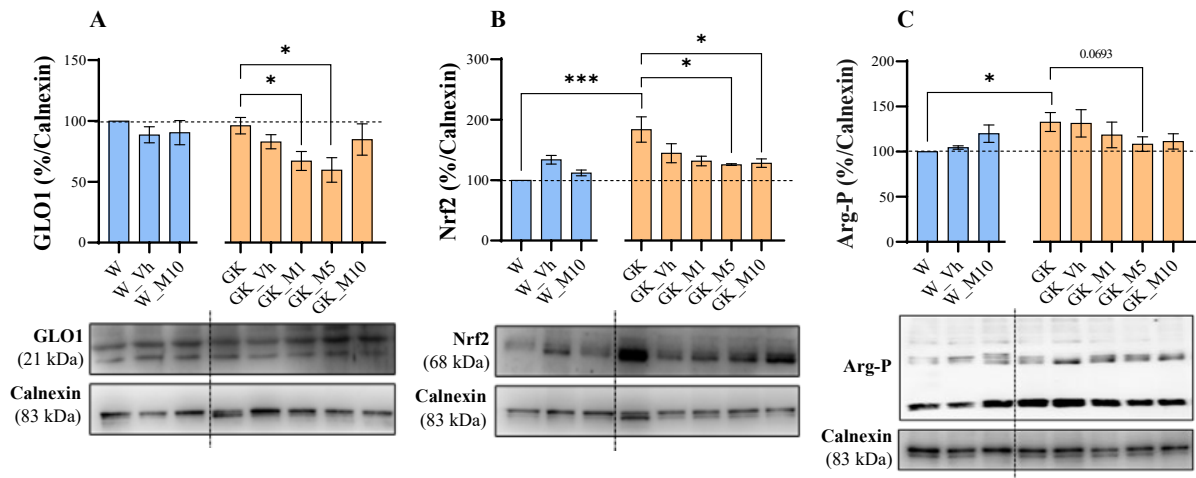

**Figure S4: Effect of melanoxinet on the expression of GLO1 (A), Nrf2 (B) and Arg-P (C) in epididymal adipose tissue.** Results are expressed as mean  $\pm$  SEM of 3 to 6 animals per group. \* $p$ <0.05, \*\*\* $p$ <0.001.

# Liver

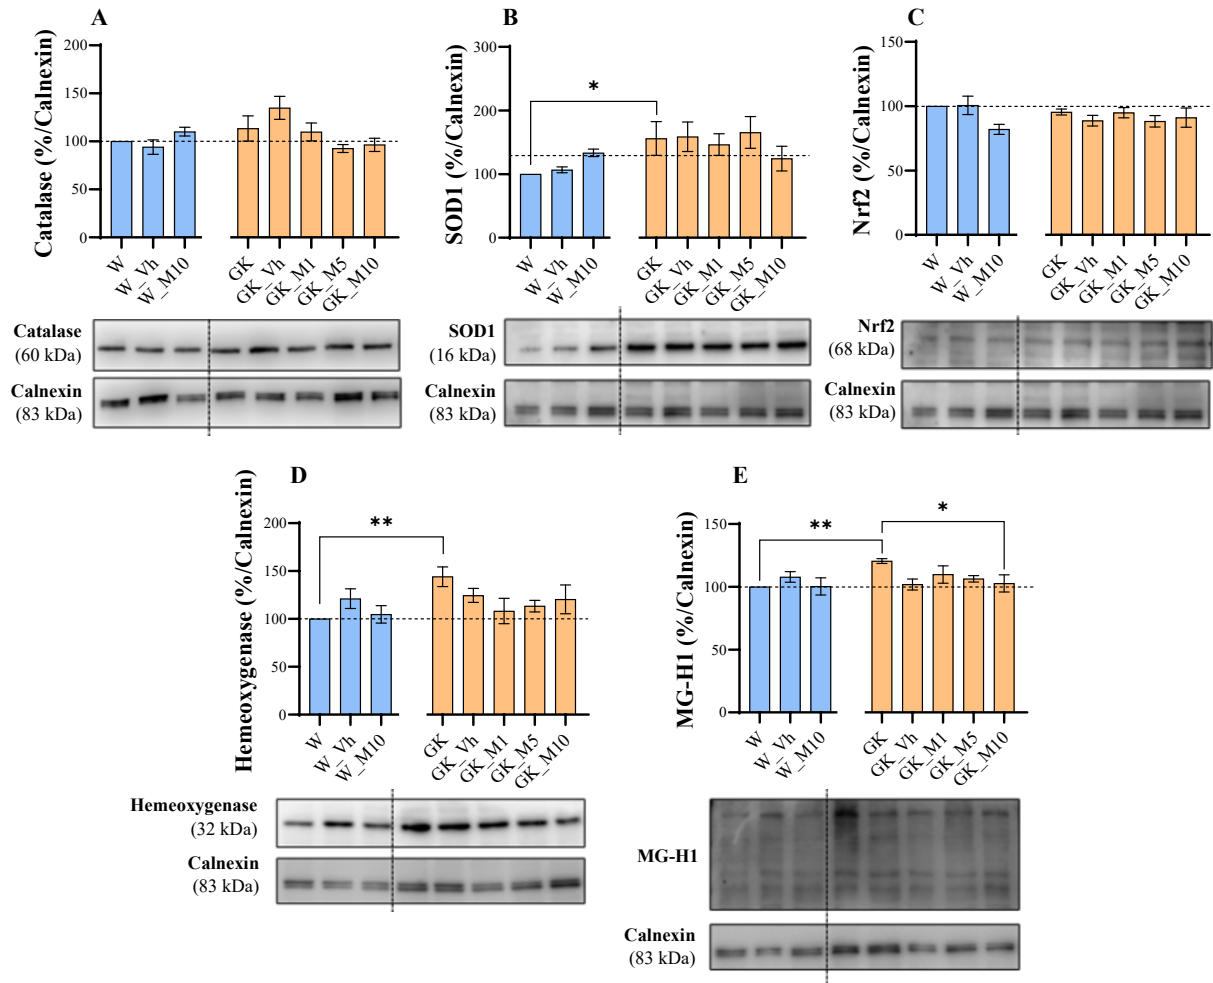

**Figure S5: Effect of melanoxetin on the expression of catalase (A), SOD1 (B), Nrf2 (C), hemeoxygenase (D), and MG-H1 (E) in liver tissue.** Results are expressed as mean  $\pm$  SEM of 3 to 6 animals per group. \* $p<0.05$ , \*\* $p<0.01$ .

# Heart

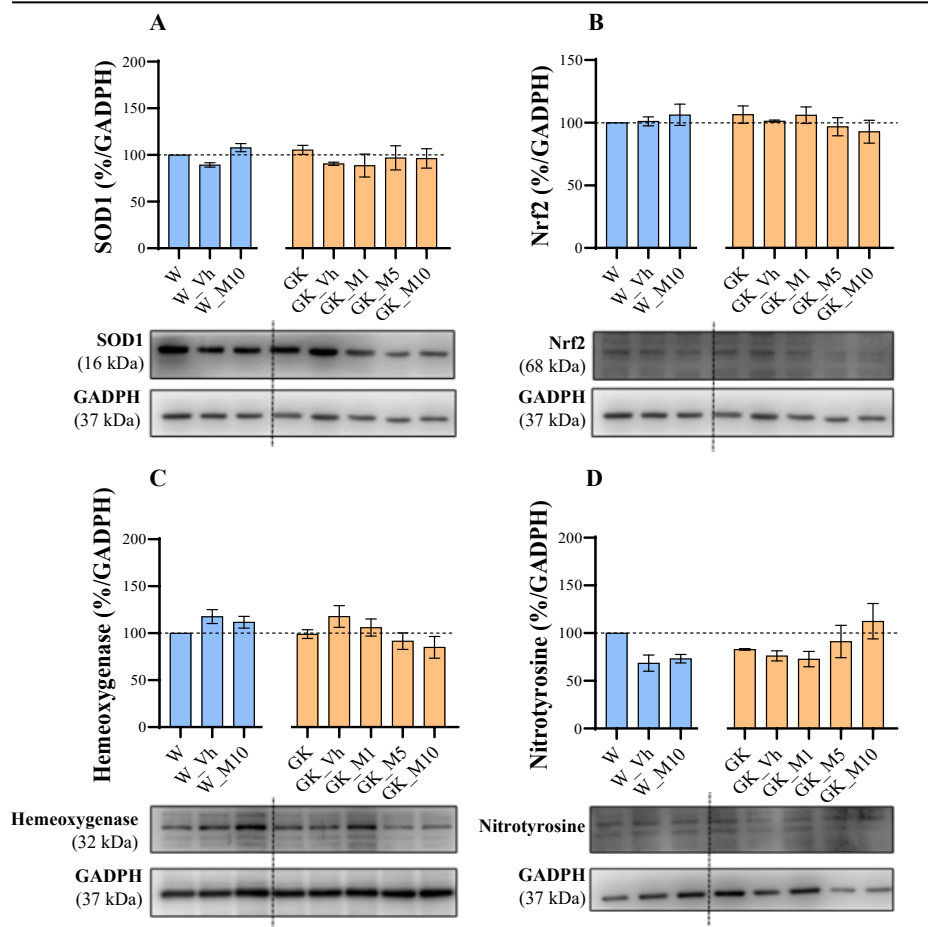

**Figure S6: Effect of melanoxinet on the expression of SOD1 (A), Nrf2 (B), hemeoxygenase (C), and nitrotyrosine (D) in the heart. Results are expressed as mean ± SEM of 3 to 6 animals per group.**

# Aorta

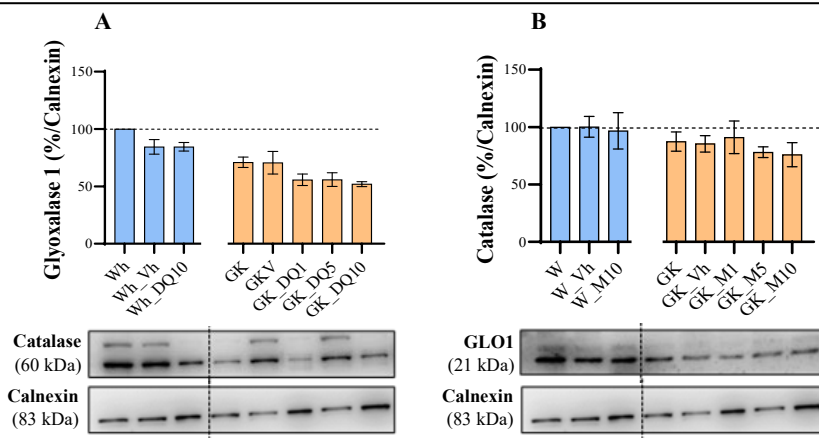

**Figure S7: Effect of melanoxetin on the expression of GLO1 (A) and catalase (B) in the aorta.** Results are expressed as mean  $\pm$  SEM of 3 to 6 animals per group.



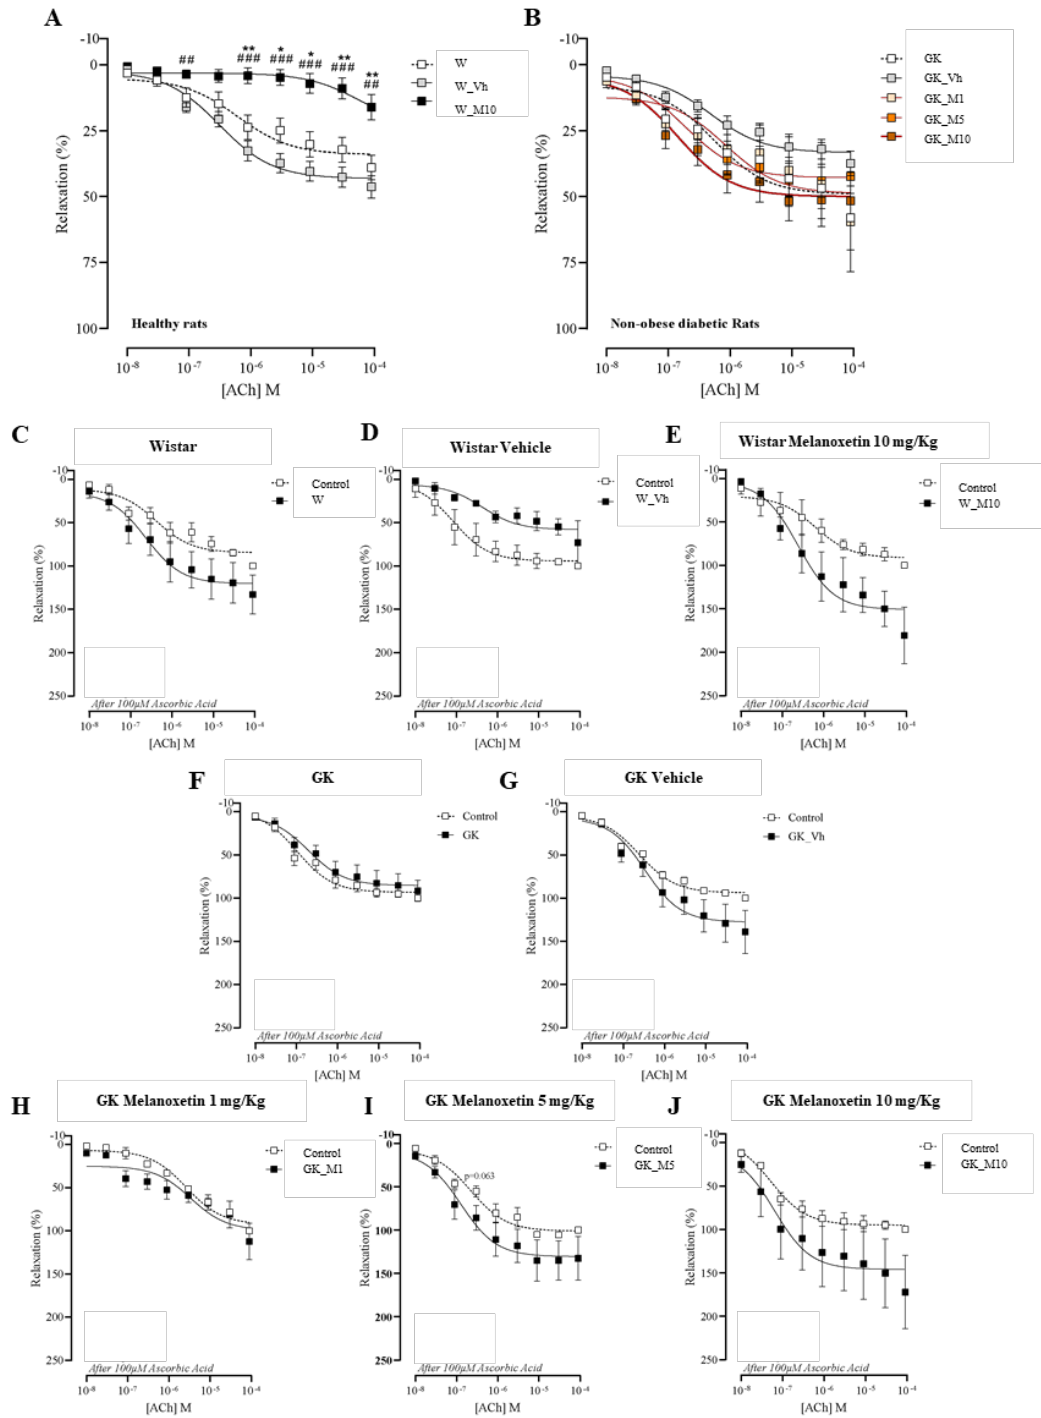

**Figure S8: Effects of melanoxin treatment on relaxation response of the isolated to acetylcholine (ACh).** The relaxation response was measured before (A and B) and after pre-incubation with ascorbic acid from Wistar control and Wistar vehicle rats (C and D), Wistar rats treated with 10mg/kg of melanoxin (E), GK control and vehicle (F and G) and GK rats administered with different concentrations of melanoxin - 1mg/kg, 5mg/kg and 10mg/kg (H, I and J).
